# Supplementary material for: Towards an AI-driven soft toy for automatically detecting and classifying infant-toy interactions using optical force sensors
Source: Frontiers journal article supplement (doi:10.3389/frobt.2024.1325296), 2024-03-12
Supplement: Data_Sheet_1.PDF [file Data_Sheet_1.PDF]

# Supplementary Material

## 1 SUPPLEMENTARY DATA

Four videos are included to demonstrate the real-time data output from the four different interactions (strong grasp, weak grasp, touch, punch) performed by a participant.

## 2 SUPPLEMENTARY FIGURES

These figures show the impact of the epoch and batch size hyperparameters on the model's accuracy in classifying trials, which informed the selection of the best-performing hyperparameter values.

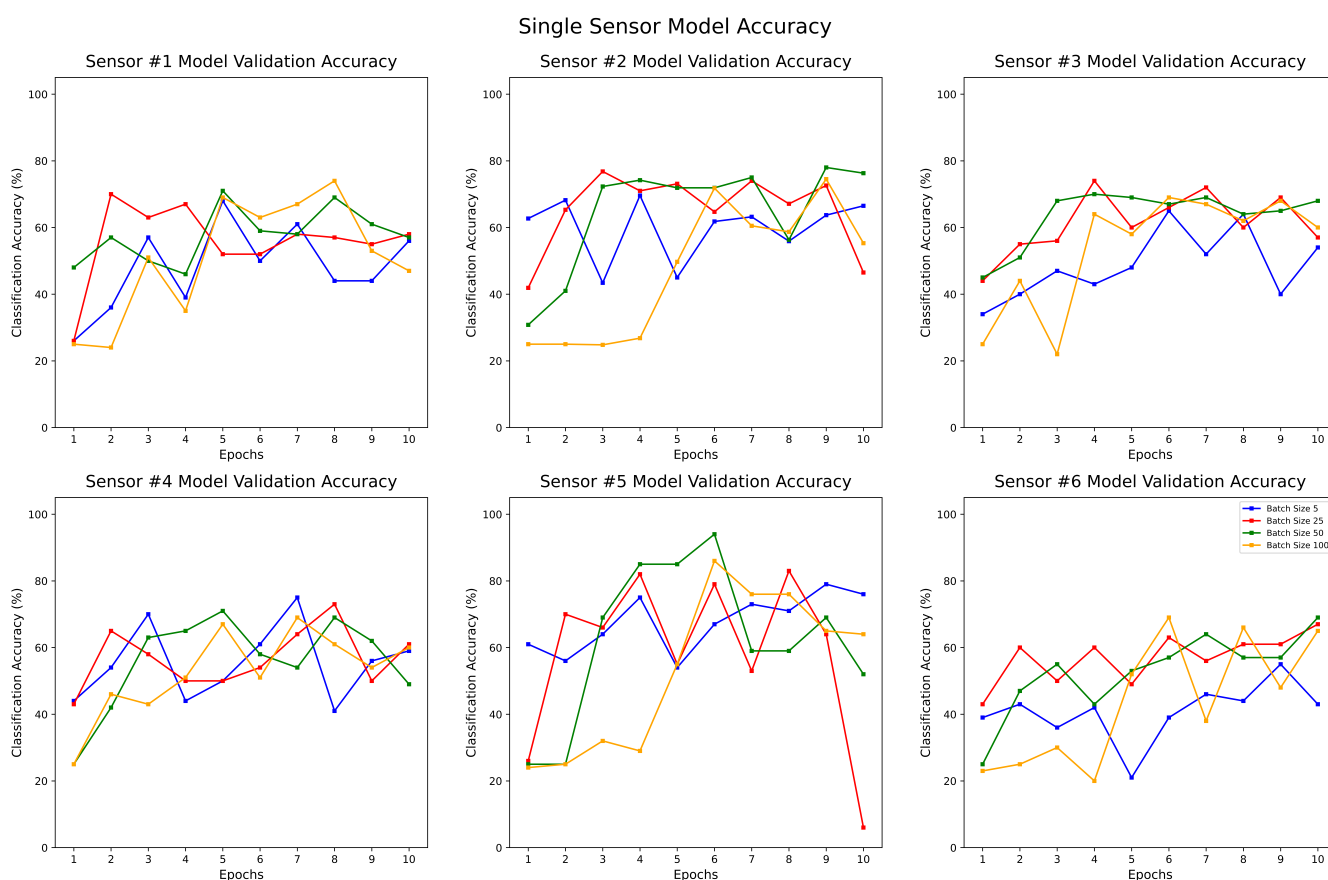

**Figure S1.** Classification accuracy of models trained on data from a single sensor

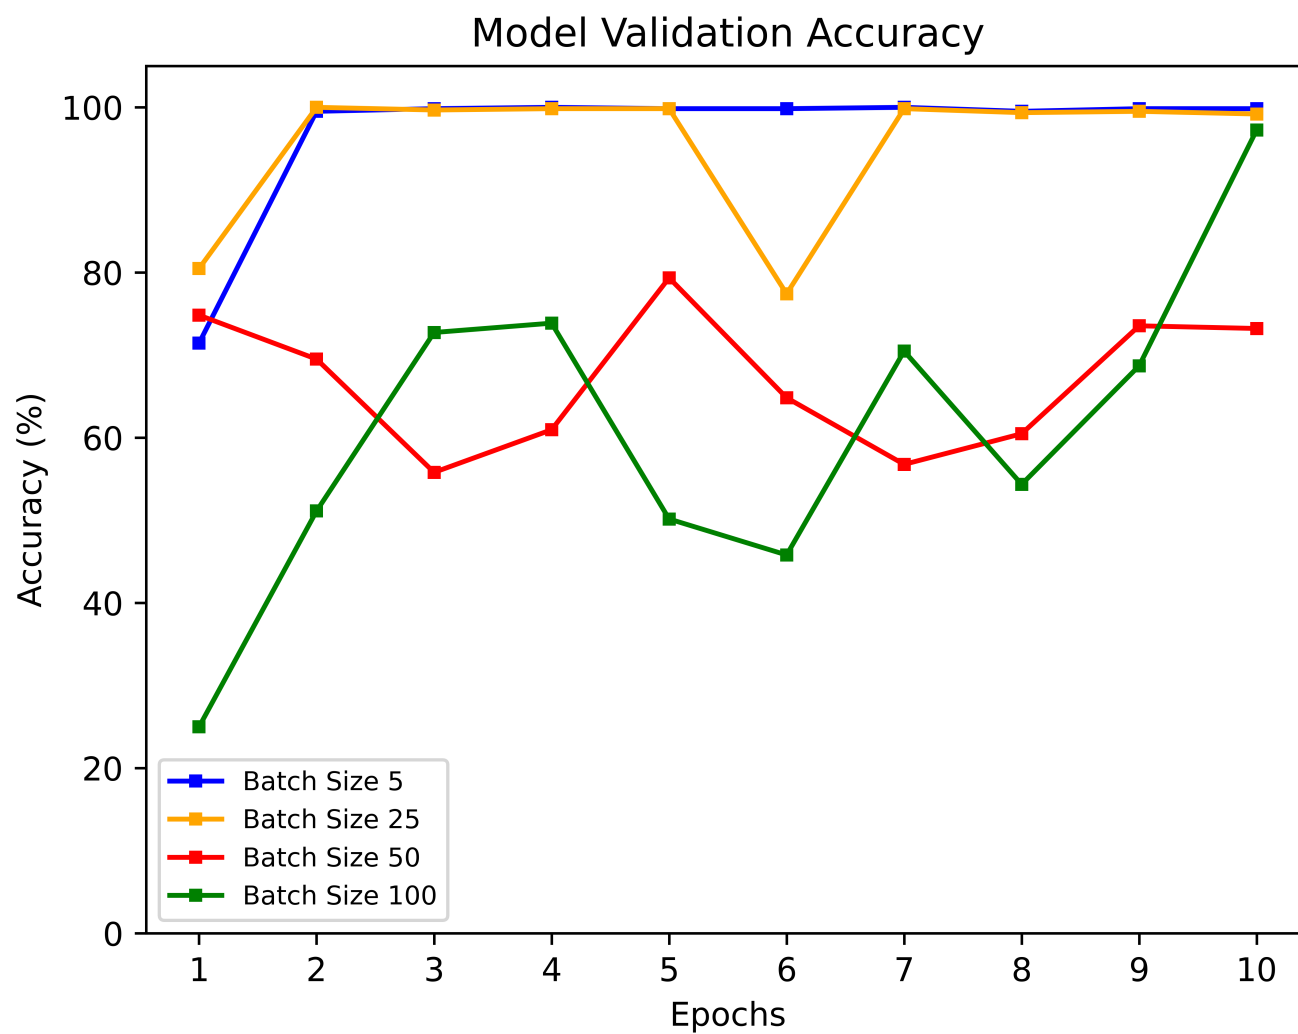

**Figure S2.** Accuracy of the 6-sensor-model trained with different batch sizes
